# Supplementary material
Source: PubMed Central journal article supplement (PMC4733424)

**A**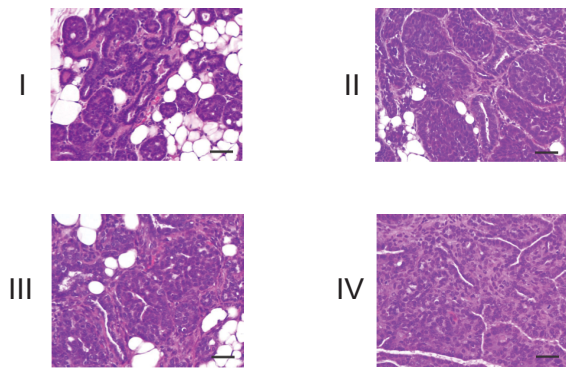**B**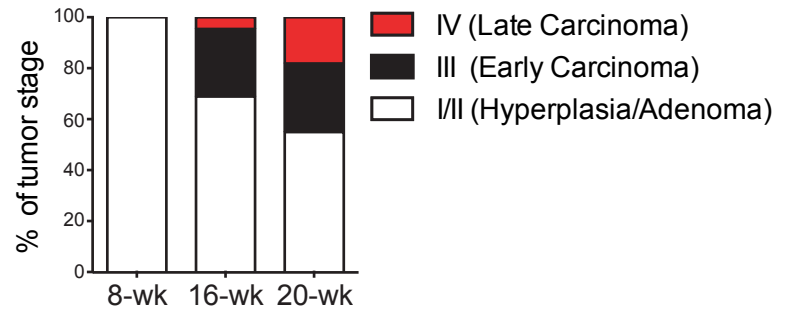**C**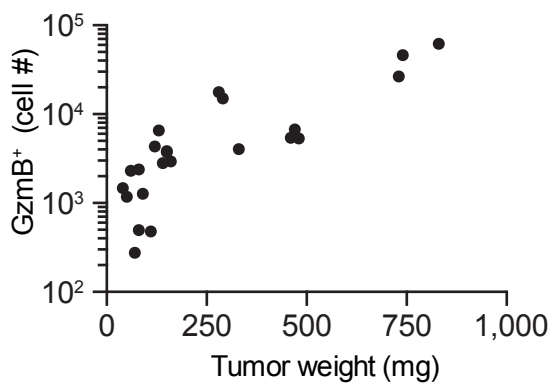**D**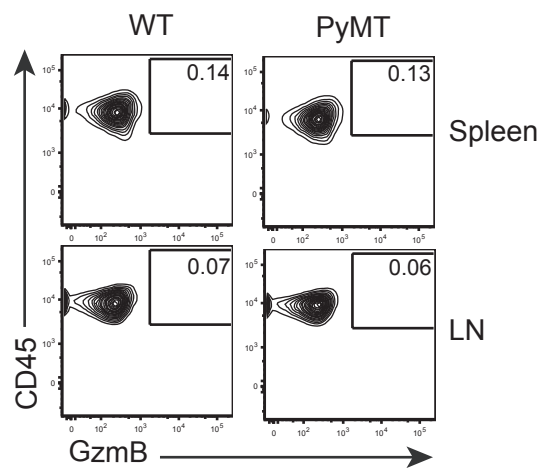**E**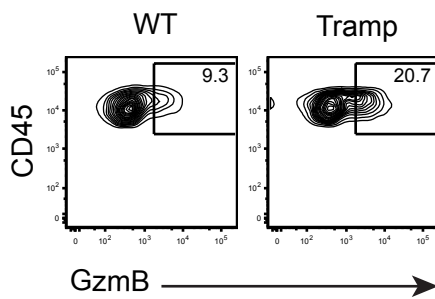**F**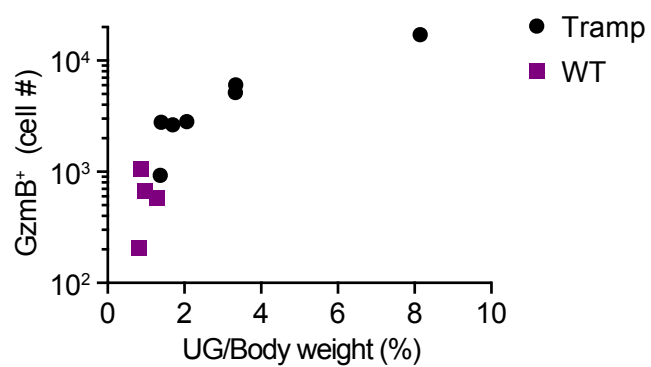**G**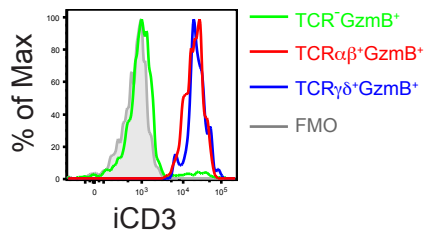

Supplement: NIHMS749692-supplement-1.pdf [file NIHMS749692-supplement-1.pdf]

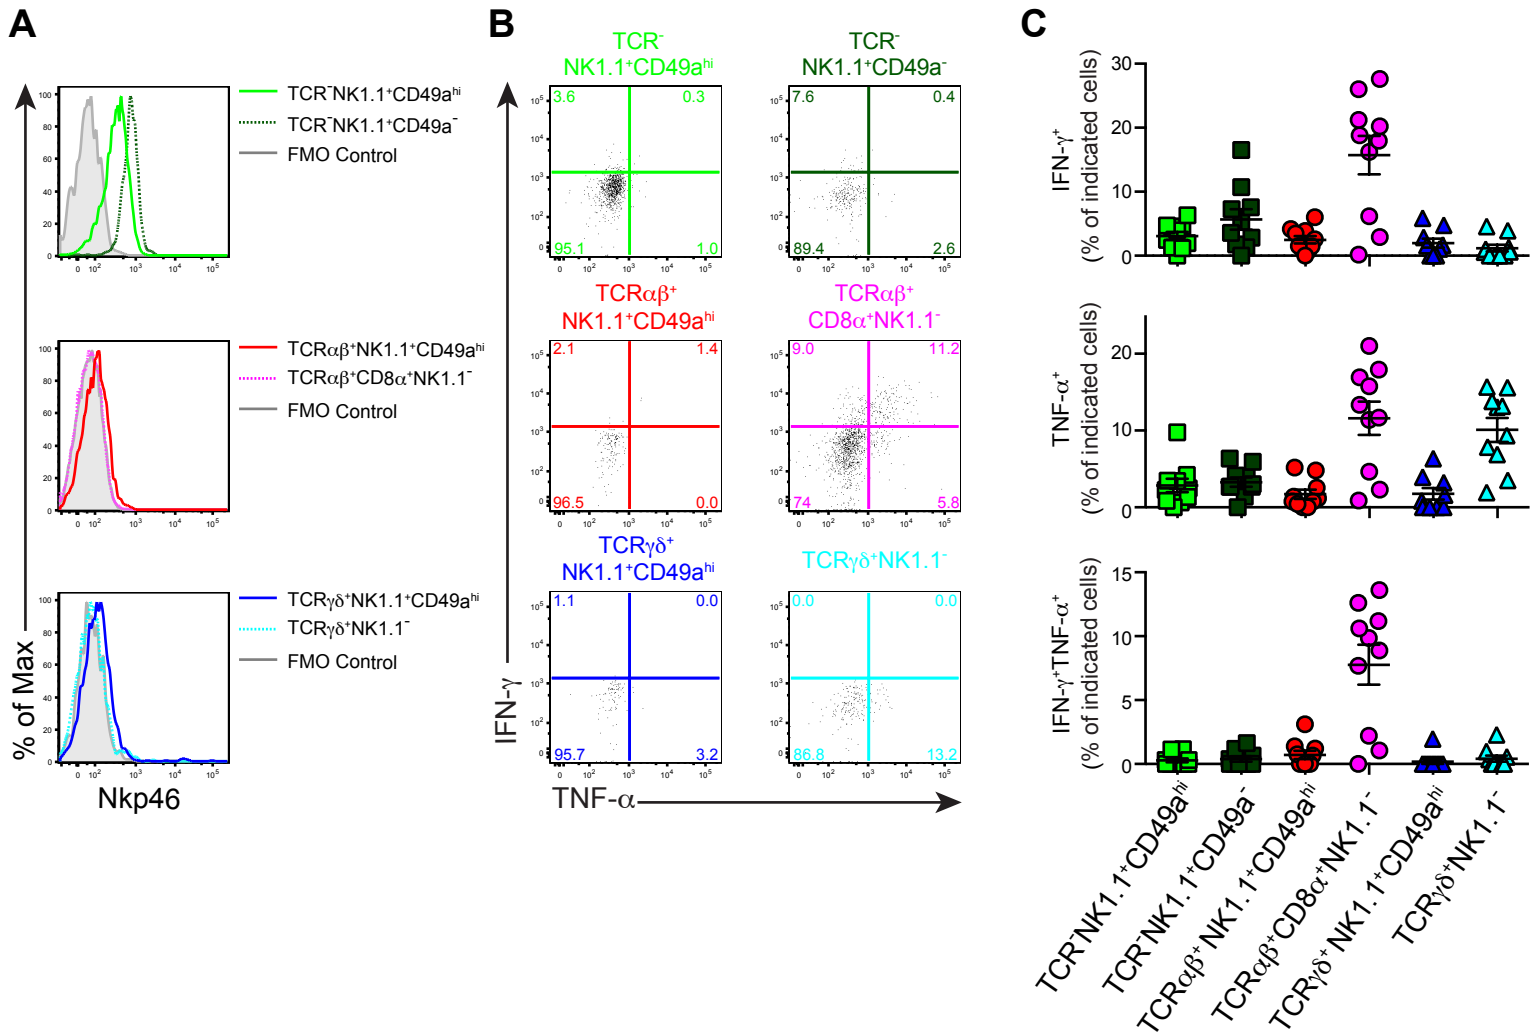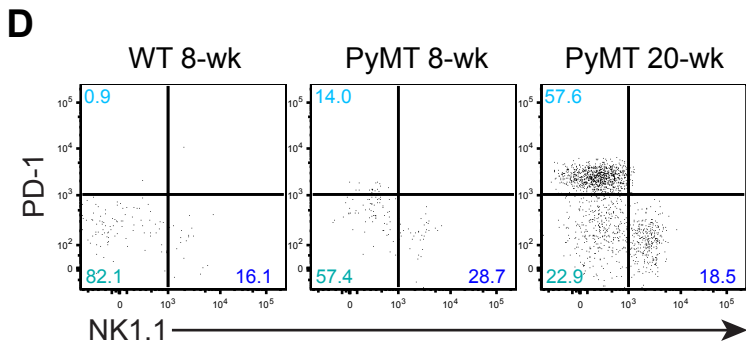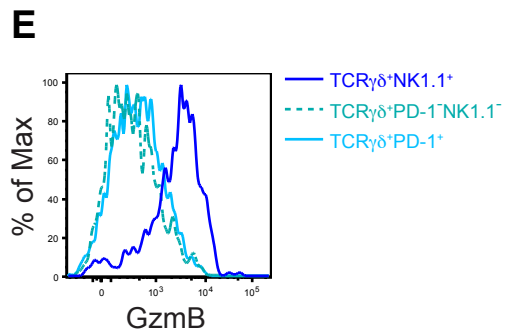

Supplement: NIHMS749692-supplement-3.pdf [file NIHMS749692-supplement-3.pdf]

**A**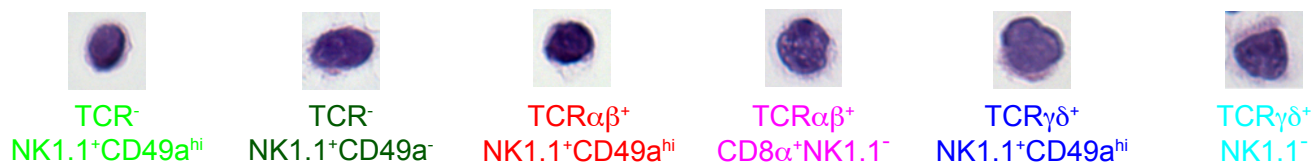**B**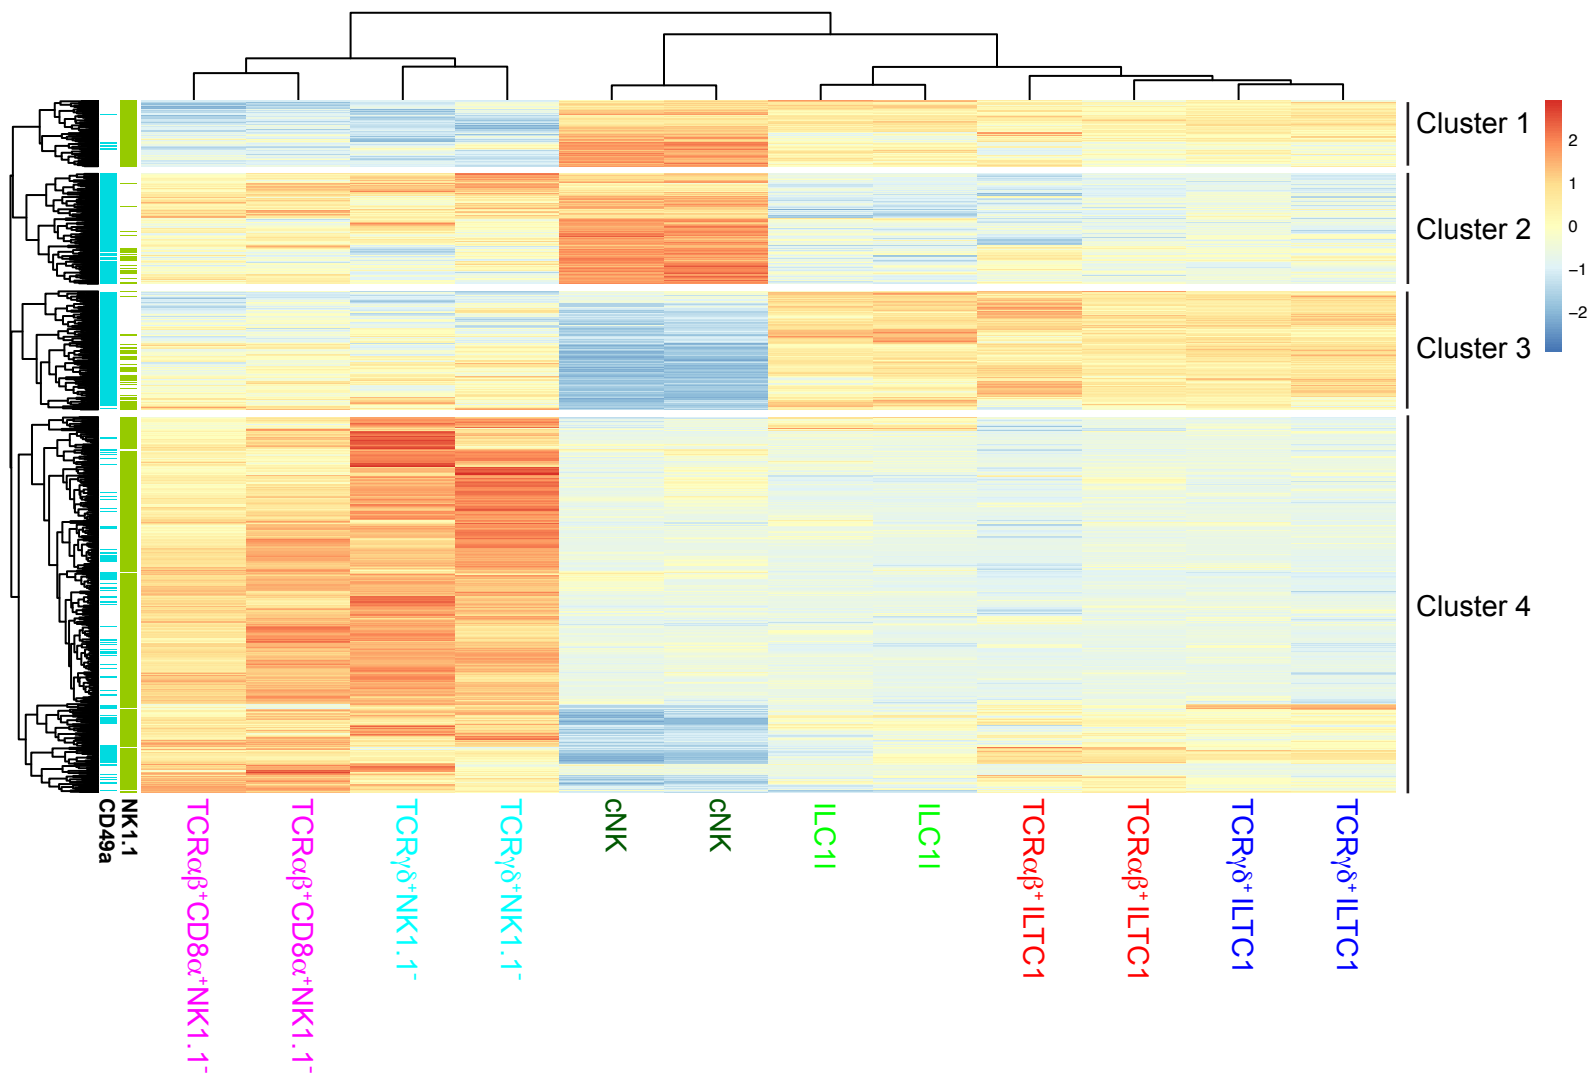

Supplement: NIHMS749692-supplement-4.pdf [file NIHMS749692-supplement-4.pdf]

**A**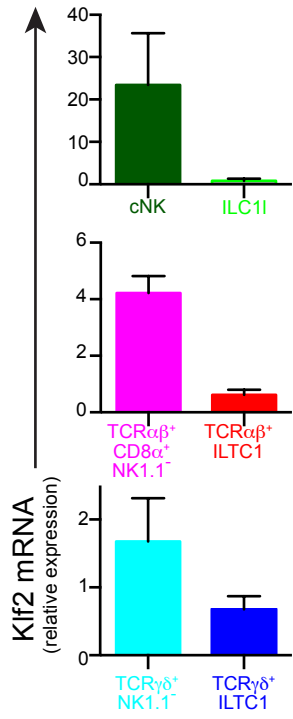**B**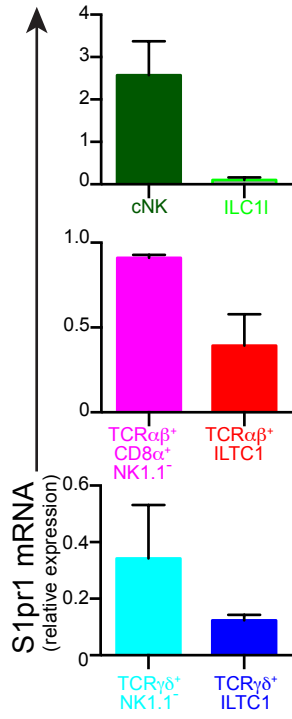**C**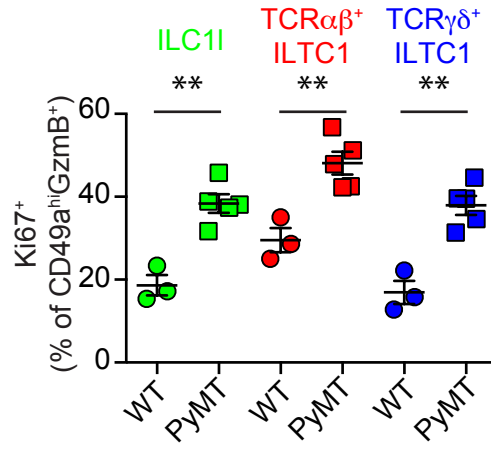

Supplement: NIHMS749692-supplement-6.pdf [file NIHMS749692-supplement-6.pdf]

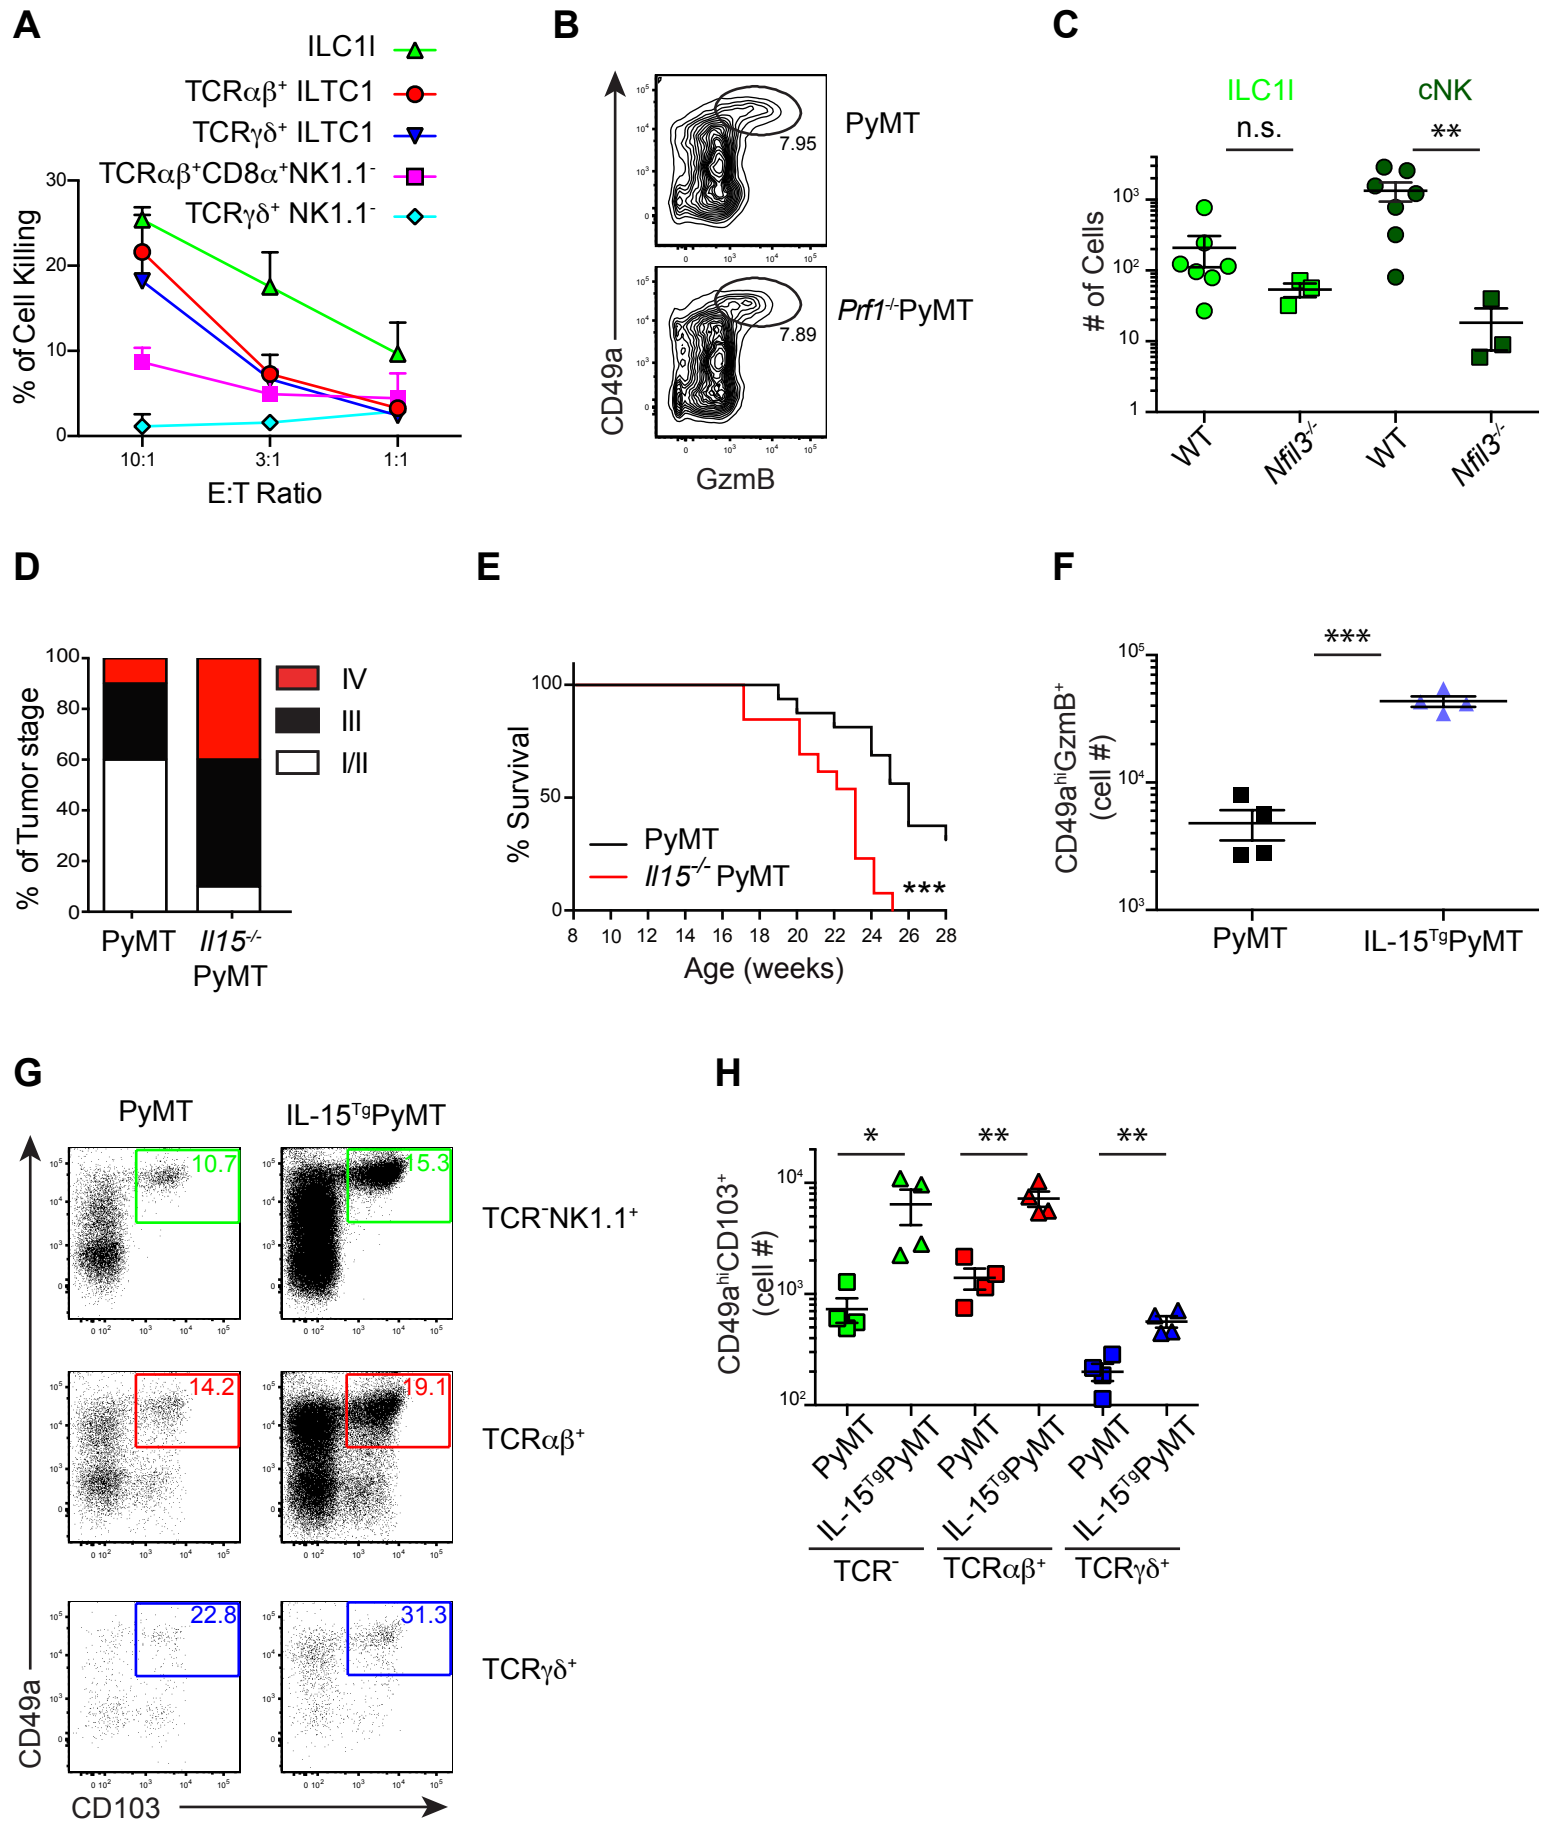

Supplement: NIHMS749692-supplement-7.pdf [file NIHMS749692-supplement-7.pdf]
